# 1 **Antiviral treatments lead to the rapid accrual of hundreds of SARS-CoV-2 mutations in** 2 **immunocompromised patients**

3 **Authors:** Nicholas M. Fountain-Jones<sup>1,2\*</sup>, Robert Vanhaefen<sup>1</sup>, Jan Williamson<sup>1</sup>, Janelle  
4 Maskell<sup>1</sup>, I-Ly J Chua<sup>1</sup>, Michael Charleston<sup>2</sup> & Louise Cooley<sup>1,3</sup>

## 5 **Affiliations:**

6 <sup>1</sup> Royal Hobart Hospital, Pathology Department, Hobart Australia 7001.

7 <sup>2</sup> School of Natural Sciences, University of Tasmania, Hobart Australia 7001.

8 <sup>3</sup> School of Medicine, University of Tasmania, Hobart Australia 7001.

9

10 **Keywords: Paxlovid, Molnupiravir, Lageviro, virus evolution, resistance**

11

## 12 **Abstract**

13

14 The antiviral Molnupiravir (Lageviro) is widely used across the world to treat SARS-CoV-2  
15 infection. Molnupiravir reduces viral replication by inducing mutations throughout the  
16 genome, yet in patients that do not clear the infection, the longer-term impact of the drug on  
17 virus evolution is unclear. Here, we used a case-control approach to monitor SARS-CoV-2  
18 genomes through time in nine immunocompromised -patients with five treated with  
19 Molnupiravir. Within days of treatment, we detected a large number of low-frequency  
20 mutations in patients and that these new mutations could persist and, in some cases, were  
21 fixed in the virus population. All patients treated with the drug accrued new mutations in the  
22 spike protein of the virus, including non-synonymous mutations that altered the amino acid  
23 sequence. Our study demonstrates that this commonly used antiviral can ‘supercharge’ viral  
24 evolution in immunocompromised patients, potentially generating new variants and  
25 prolonging the pandemic.

26

27 **Main text:**

28

29 Persistent SARS-CoV-2 infection in immunocompromised patients is recognized as an  
 30 important source of genomic variation and is linked to the evolution of novel variants <sup>1-3</sup>.  
 31 How commonly used antivirals such as Molnupiravir shape viral evolution is an important  
 32 knowledge gap. As of December 2022, Molnupiravir is routinely used globally to treat  
 33 COVID patients in and outside of hospital settings, including treatment of  
 34 immunocompromised patients <sup>4</sup>. Molnupiravir and other similar direct-acting SARS-CoV-2  
 35 antivirals promote mutagenesis by incorporating the prodrug NHC ( $\beta$ -D-N4-hydroxycytidine)  
 36 into the virus-dependent RNA polymerase (RdRp)<sup>5</sup>. When the RdRp uses the NHC modified  
 37 RNA as a template it promotes an ‘error catastrophe’ <sup>5,6</sup> that inhibits the replication of SARS-  
 38 CoV-2. For immunocompromised patients that do not clear infection after antiviral treatment,  
 39 the impact that these drugs have on patterns of virus evolution is unclear.

40

41 We intensively monitored nine immunocompromised patients; five patients were swabbed  
 42 pre and post Molnupiravir treatment and four patients did not receive the drug. We found that  
 43 as little as 10 days after Molnupiravir treatment, patient SARS-CoV-2 genomes had accrued  
 44 on average 30 new low-mid frequency variants (between 10-90% of reads, Fig 1). We did not  
 45 find similar changes to viral diversity in the patients not treated with Molnupiravir (Fig. 1).  
 46 We commonly detected non-synonymous mutations in the spike protein that is the current  
 47 vaccine target (Fig. 1, Appendix 1) and subsequent samples from these patients demonstrated  
 48 that some of these spike mutations were fixed (frequency > 90%, e.g., Patient E Thr547Lys).  
 49 In Patient B, 36 days after treatment 10 novel non-synonymous mutations were fixed,  
 50 including mutations in the spike protein (Fig. 1/S1). This represents approximately 33% of  
 51 the mutations that define the Omicron variant <sup>7</sup>. However, we found some mutations were

52 transient, as many were not detected in the subsequent samples (Fig. 1, multiple infections  
53 were ruled out).

54

55 These data highlight the risk of treating immunocompromised patients with error generating  
56 antivirals such as Molnupiravir. All of the individuals in our study remained persistently PCR  
57 positive post-treatment, although active monitoring for clearance was not undertaken by the  
58 institution. It is possible they were infectious in the hospital and in their communities, and  
59 onward transmission of these highly divergent viruses is likely. This commonly used class of  
60 antivirals has the capability to supercharge SARS-CoV- 2 evolution, and uncontrolled use  
61 may generate new variants with a transmission advantage that prolongs the pandemic and  
62 makes other therapeutics less effective.

63

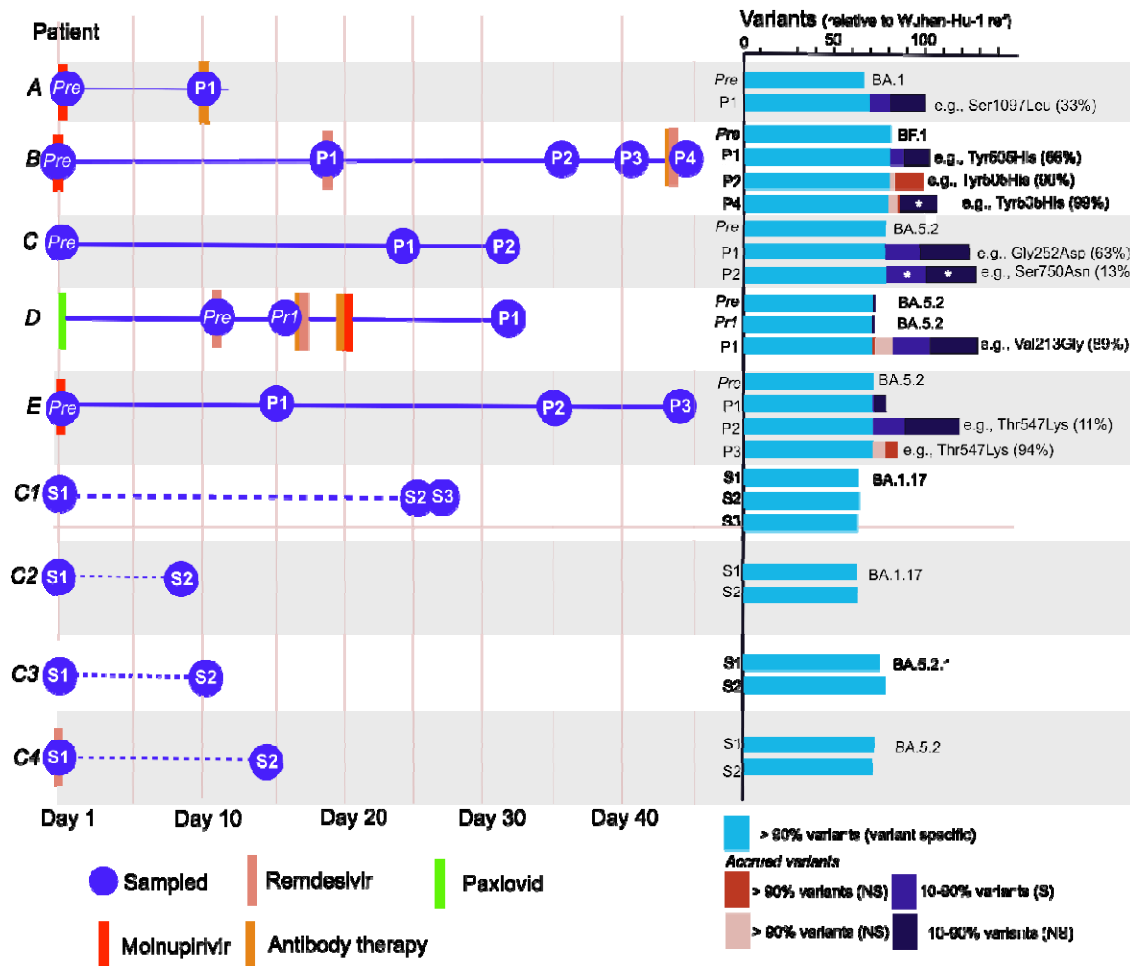

**Fig. 1:** Patient histories, sampling regimen and variant count in each sample (Prep: pre-treatment sample, pr1: pre Molnupirivir treatment but post Remdesivir treatment, P1-4: subsequent samples post-treatment, S1-3: samples from untreated patients). The Omicron subvariant lineage of each patient is reported next to the variant count from the pre-sample. Patients with dotted lines (C1-4) were not treated with Molnupirivir. The text next to the variant counts highlights a non-synonymous mutation to the spike protein that had either the highest frequency or increased in frequency in subsequent samples. White star: variants found were completely distinct from the previous sample.

## 74 **Data availability statement**

75 All data will be available online at GISAID. The sequence alignment is available upon  
76 request.

77

## 78 **Funding**

79 This project was supported by an Australian Research Council Discovery Project Grant  
80 (DP190102020).

81

## 82 **References**

- 83 1. Martin DP, Lytras S, Lucaci AG, et al. Selection analysis identifies unusual clustered  
84 mutational changes in Omicron lineage BA.1 that likely impact Spike function [Internet].  
85 2022 [cited 2022 Aug 30];2022.01.14.476382. Available from:  
86 <https://www.biorxiv.org/content/10.1101/2022.01.14.476382v1>
- 87 2. Karim F, Moosa MYS, Gosnell BI, et al. Persistent SARS-CoV-2 infection and intra-host  
88 evolution in association with advanced HIV infection [Internet]. 2021 [cited 2022 Aug  
89 29];2021.06.03.21258228. Available from:  
90 <https://www.medrxiv.org/content/10.1101/2021.06.03.21258228v1>
- 91 3. Tegally H, Wilkinson E, Giovanetti M, et al. Detection of a SARS-CoV-2 variant of  
92 concern in South Africa. *Nature* 2021;592(7854):438–43.
- 93 4. Singh AK, Singh A, Singh R, Misra A. An updated practical guideline on use of  
94 molnupiravir and comparison with agents having emergency use authorization for  
95 treatment of COVID-19. *Diabetes Metab Syndr* 2022;16(2):102396.
- 96 5. Kabinger F, Stiller C, Schmitzová J, et al. Mechanism of molnupiravir-induced SARS-  
97 CoV-2 mutagenesis. *Nat Struct Mol Biol* 2021;28(9):740–6.
- 98 6. Sheahan TP, Sims AC, Zhou S, et al. An orally bioavailable broad-spectrum antiviral  
99 inhibits SARS-CoV-2 in human airway epithelial cell cultures and multiple coronaviruses  
100 in mice. *Sci Transl Med* 2020;12(541):eabb5883.
- 101 7. Fantini J, Yahi N, Colson P, Chahinian H, La Scola B, Raoult D. The puzzling mutational  
102 landscape of the SARS-2-variant Omicron. *Journal of Medical Virology*  
103 2022;94(5):2019–25.
- 104 8. Turakhia Y, Thornlow B, Hinrichs AS, et al. Ultrafast Sample placement on Existing  
105 tRees (USHER) enables real-time phylogenetics for the SARS-CoV-2 pandemic. *Nat*  
106 *Genet* 2021;53(6):809–16.

107

108

## Supplementary text:

### Methods

#### *Study population*

The 9 patients included in this study were immunocompromised due to a number of aetiologies, including haematological malignancy, solid organ and allogenic stem cell transplantation, and treatment of vasculitis that had tested qPCR positive to SARS CoV-2 infection. Six patients were treated with antivirals (one just with Remdesivir) and five were treated with Molnupirivir. The patients not treated with Molnupirivir were diagnosed with the virus before approval of the drug in Australia and acted as a quasi-control.

#### *Real-Time PCR assay*

Flocked swabs were collected from the throat and nasopharynx and immediately placed in 2.5mL viral transport Fluid (VTF).

Samples were vortexed for 1 minute and 200µL VTF was extracted on the Magnapure96 instrument (Roche) using the DNA/RNA SV kit and Pathogen Universal 200 protocol.

Ten microlitres of eluate was used in a 20µL multiplex real time PCR containing 1x MDX-016 mastermix (Meridian Bioscience), with primers and probes (Bioneer) targeting the SARS-CoV-2 matrix and RdRP genes, and human RNaseP gene as a control. Oligo sequences are shown below.

| Oligo Name | Sequence (5'-3')                    | Final concentration (µM) |
|------------|-------------------------------------|--------------------------|
| RHH-M-F    | TGTTGCTACATCACGAACGC                | 0.25µM                   |
| RHH-M-R    | GCCAATCCTGTAGCGACTGT                | 0.25µM                   |
| RHH-M-Pr   | FAM-AACCTGAGTC[EBQ]ACCTGCTACACG-EBQ | 0.1µM                    |
|            |                                     |                          |
| RHH-RdRP-F | CGTGTTGTAGCTTGTCACACC               | 0.25µM                   |

|            |                                           |        |
|------------|-------------------------------------------|--------|
| RHH-RdRP-R | ATAGTGAACCGCCACACATGA                     | 0.25μM |
| RHH-RdRP-P | HEX-TCTATAGATT[EBQ]AGCTAATGAGTGTGCTCA-EBQ | 0.1μM  |
|            |                                           |        |
| RNaseP-F   | AGATTTGGACCTGCGAGCG                       | 0.1μM  |
| RNaseP-R   | GAGCGGCTGTCTCCACAAGT                      | 0.1μM  |
| RNaseP-Pr  | CY5-TTCTGACCTG[EBQ]AAGGCTC-EBQ            | 0.1μM  |

Table S1. RT-PCR primer and probe sequences.

PCR was performed on an LC480 instrument (Roche) with thermal cycling parameters as follows: 50°C for 15 minutes, 95°C for 2 minutes, then 40 cycles of 95°C for 10 seconds and 60°C for 30 seconds with fluorescence collected at the 60°C step.

### Tiled amplicon sequencing

Overlapping amplicons were generated using the QIAseq SARS-CoV-2 Primer Panel kit (Qiagen) as per the manufacturer's instructions except substituting a custom primer set and using a 60°C annealing/extension temperature.

| Amplicon | Pool | Oligo Name        | Sequence                    | Length | RefSeq 5' | RefSeq 3' | Amplicon size | Final Concentration in PCR |
|----------|------|-------------------|-----------------------------|--------|-----------|-----------|---------------|----------------------------|
| 1        | 1    | RHH_SARS COV2_01F | TCCAGGTAAACAAACCAACCA       | 22     | 18        | 39        | 1102          | 0.04uM                     |
|          | 1    | RHH_SARS COV2_01R | TGAATAGTCTTGATTATGGAATTTAAG | 30     | 1090      | 1119      |               | 0.04uM                     |
| 2        | 2    | RHH_SARS COV2_02F | ACCTTCAATGGGGAATGTCCA       | 21     | 1058      | 1078      | 1112          | 0.04uM                     |
|          | 2    | RHH_SARS COV2_02R | AACTTCTCTCAAGCCAATCAAGG     | 24     | 2146      | 2169      |               | 0.04uM                     |
| 3        | 1    | RHH_SARS COV2_03F | TGGCTAACTAACATCTTTGGCAC     | 23     | 2099      | 2121      | 1145          | 0.08uM                     |
|          | 1    | RHH_SARS COV2_03R | CCGCTTGTGACCAACAGTTT        | 22     | 3222      | 3243      |               | 0.08uM                     |
| 4        | 2    | RHH_SARS COV2_04F | ACCTGAA GAAGA GCAAGAA GA    | 24     | 3175      | 3198      | 1127          | 0.04uM                     |
|          | 2    | RHH_SARS COV2_04R | GCACTGTCTTTGCCTCCTCT        | 20     | 4282      | 4301      |               | 0.04uM                     |
| 5        | 1    | RHH_SARS COV2_05F | GGGTGTTTAACTGCTGTGGT        | 21     | 4144      | 4164      | 1134          | 0.04uM                     |
|          | 1    | RHH_SARS COV2_05R | TCTGCCATTTAATA GAAGTTAAACCA | 28     | 5250      | 5277      |               | 0.04uM                     |
| 6        | 2    | RHH_SARS COV2_06F | ACACTAAAAGTGGAAATACCCACAA   | 26     | 5220      | 5245      | 1160          | 0.04uM                     |
|          | 2    | RHH_SARS COV2_06R | ATTATCCATTCCCTGCGCGT        | 20     | 6360      | 6379      |               | 0.04uM                     |
| 7        | 1    | RHH_SARS COV2_07F | CGTTTGATGTAAGTCAAGG         | 24     | 6336      | 6359      | 1021          | 0.04uM                     |
|          | 1    | RHH_SARS COV2_07R | AGCCAAGAATTA CTAATAAAATGTA  | 29     | 7328      | 7356      |               | 0.04uM                     |
| 8        | 2    | RHH_SARS COV2_08F | TGGATTGGCTGCAATCATGC        | 20     | 7288      | 7307      | 1111          | 0.04uM                     |
|          | 2    | RHH_SARS COV2_08R | CAAAGCAATGTTGTGACTTTTGCT    | 25     | 8374      | 8398      |               | 0.04uM                     |
| 9        | 1    | RHH_SARS COV2_09F | GCGTCATATTAAATGCGCAGGT      | 21     | 8353      | 8373      | 1097          | 0.04uM                     |
|          | 1    | RHH_SARS COV2_09R | AGGCAAGGCATGTACTACGA        | 21     | 9429      | 9449      |               | 0.04uM                     |
| 10       | 2    | RHH_SARS COV2_10F | AGCATCTATAGTCTGGTGGTA       | 23     | 9397      | 9419      | 1141          | 0.04uM                     |
|          | 2    | RHH_SARS COV2_10R | GTAACAAAAGAGACACATCATAAT    | 28     | 10510     | 10537     |               | 0.04uM                     |
| 11       | 1    | RHH_SARS COV2_11F | TGGTTCATGTGGTGTGTTGGT       | 22     | 10480     | 10501     | 1153          | 0.08uM                     |
|          | 1    | RHH_SARS COV2_11R | AAAATAGCCTAAGAAACAATAACTA   | 29     | 11604     | 11632     |               | 0.08uM                     |
| 12       | 2    | RHH_SARS COV2_12F | TGCCCTATTTCTTCATAA CTGGT    | 24     | 11561     | 11584     | 1117          | 0.04uM                     |
|          | 2    | RHH_SARS COV2_12R | TGACAGCAGAAATGGCCCTT        | 20     | 12658     | 12677     |               | 0.04uM                     |
| 13       | 1    | RHH_SARS COV2_13F | GCATGGCCTCTTATTGTAACA GC    | 23     | 12632     | 12654     | 1149          | 0.04uM                     |
|          | 1    | RHH_SARS COV2_13R | TATGTGGTACCATGTACCCTGC      | 22     | 13759     | 13780     |               | 0.04uM                     |

|    |   |                   |                             |    |       |       |      |        |
|----|---|-------------------|-----------------------------|----|-------|-------|------|--------|
| 14 | 2 | RHH_SARS COV2_14F | GTCCAGCTGTTGCTAAACATGA      | 22 | 13718 | 13739 | 1124 | 0.04uM |
|    | 2 | RHH_SARS COV2_14R | TCTGATATCACACATTGTTGGTAGAT  | 26 | 14816 | 14841 |      | 0.04uM |
| 15 | 1 | RHH_SARS COV2_15F | GCTCAGGATGGTAATGCTGC        | 20 | 14767 | 14786 | 1118 | 0.04uM |
|    | 1 | RHH_SARS COV2_15R | TGAGAGCAAAATTCATGAGGTCC     | 23 | 15862 | 15884 |      | 0.04uM |
| 16 | 2 | RHH_SARS COV2_16F | ATGTTGGACTGAGACTGACCTT      | 22 | 15834 | 15855 | 1104 | 0.04uM |
|    | 2 | RHH_SARS COV2_16R | GGCATTACTGTATGTGATGTCA GC   | 24 | 16914 | 16937 |      | 0.04uM |
| 17 | 1 | RHH_SARS COV2_17F | ACCGAGGTACAACAACCTTACAAA    | 23 | 16868 | 16890 | 1112 | 0.04uM |
|    | 1 | RHH_SARS COV2_17R | AAAGTCTCTATCAGACATTATGCAAA  | 27 | 17953 | 17979 |      | 0.04uM |
| 18 | 2 | RHH_SARS COV2_18F | GCTATTACCAAGCAAAAGTAGGC     | 24 | 17926 | 17949 | 1125 | 0.04uM |
|    | 2 | RHH_SARS COV2_18R | AGCTTTA GGGTTACCAATGTCGT    | 23 | 19028 | 19050 |      | 0.04uM |
| 19 | 1 | RHH_SARS COV2_19F | AGCAGACAAATCCCAAGTTCTTC     | 23 | 19005 | 19027 | 1130 | 0.04uM |
|    | 1 | RHH_SARS COV2_19R | CGGCTTCTCCAATTAATGTGACT     | 23 | 20112 | 20134 |      | 0.04uM |
| 20 | 2 | RHH_SARS COV2_20F | AACCATCTGTAGGTCCCAACA       | 22 | 20075 | 20096 | 1120 | 0.04uM |
|    | 2 | RHH_SARS COV2_20R | TCAGCATTCAGGAATGTTCTGTT     | 24 | 21171 | 21194 |      | 0.04uM |
| 21 | 1 | RHH_SARS COV2_21F | GCTAGCTCTTGAGGTTCCG         | 20 | 21138 | 21157 | 1132 | 0.04uM |
|    | 1 | RHH_SARS COV2_21R | GTGATGTTAATACCTATTGGCAATCT  | 27 | 22243 | 22269 |      | 0.04uM |
| 22 | 2 | RHH_SARS COV2_22F | CCCTCAGGGTTTTTCGCTT         | 20 | 22210 | 22229 | 1089 | 0.04uM |
|    | 2 | RHH_SARS COV2_22R | GGATCACGGACAGCATCAGT        | 20 | 23279 | 23298 |      | 0.04uM |
| 23 | 1 | RHH_SARS COV2_23F | GGCAGAGACATTGCTGACACT       | 21 | 23258 | 23278 | 1131 | 0.04uM |
|    | 1 | RHH_SARS COV2_23R | TGCTGTGGAAGAAAGTGAGTCT      | 22 | 24367 | 24388 |      | 0.04uM |
| 24 | 2 | RHH_SARS COV2_24F | TGAGAACCAAAATTGATTGCCAAC    | 25 | 24313 | 24337 | 1115 | 0.04uM |
|    | 2 | RHH_SARS COV2_24R | GTTCCAATTGTGAAGATTCTCATAAAC | 28 | 25400 | 25427 |      | 0.04uM |
| 25 | 1 | RHH_SARS COV2_25F | CAGTGCTCAAAGGAGTCAAATTACA   | 25 | 25350 | 25374 | 1130 | 0.04uM |
|    | 1 | RHH_SARS COV2_25R | AGTTCGTTTAGACCAAGATCAG      | 24 | 26456 | 26479 |      | 0.04uM |
| 26 | 2 | RHH_SARS COV2_26F | ACGTTTACTCTCGTGTAAAATCTGA   | 27 | 26414 | 26440 | 1030 | 0.04uM |
|    | 2 | RHH_SARS COV2_26R | AGCTCACAAGTAGCGAGTGT        | 20 | 27424 | 27443 |      | 0.04uM |
| 27 | 1 | RHH_SARS COV2_27F | TGAAAATTATTCTTTCTTGGCACTGA  | 27 | 27395 | 27421 | 1135 | 0.04uM |
|    | 1 | RHH_SARS COV2_27R | AGCCAATTTGGTCATCTGGACT      | 22 | 28508 | 28529 |      | 0.04uM |
| 28 | 2 | RHH_SARS COV2_28F | AATTCCTCGAGGACAAAGGC        | 20 | 28467 | 28486 | 1127 | 0.08uM |
|    | 2 | RHH_SARS COV2_28R | CGTAAACGGAAGCGAAAA CG       | 22 | 29572 | 29593 |      | 0.08uM |
| 29 | 1 | RHH_SARS COV2_29F | CCTGCTA GAATGGCTGGCAA       | 20 | 28892 | 28911 | 979  | 0.04uM |
|    | 1 | RHH_SARS COV2_29R | GTCAATCTCTAAGAAAGCTATTAAAT  | 29 | 29842 | 29870 |      | 0.04uM |

Table S2. Tiled amplicon primer sequences.

Amplicon concentration was measured using the Qubit 1X BR kit on a Qubit flex instrument (Thermo). Approximately 200ng of amplicon was fragmented and barcoded using the Illumina DNA Prep kit as per the manufacturer's instructions before 2x151 sequencing on an Illumina Miniseq. Basecalling, demultiplexing and adapter trimming were performed on-instrument.

### *Sequence analysis and variant calling*

Raw reads were imported in CLC Genomics Workbench 21.0.5 and analyzed using a custom workflow. Reads were quality trimmed (<20) before being aligned to the SAR CoV-2 Wuhan-Hu-1 reference sequence. Primer sequences were trimmed from read mappings and variants called using the low frequency variant caller with a threshold of 10% VAF, a minimum coverage of 10-fold and a minimum of 5 variant read support. A consensus sequence was derived from mapped reads with bases below 10-fold coverage replaced with N



and mixed base sites between 10% and 90% given IUB mixed base codes. Lineage and sub-lineages were identified through the web base Pangolin version 3.1.20 version date 28/02/2022.

To compare variants from our patient samples with global reference sequences and to visualize the locations of the mutations across the genome we used the Ultrafast Sample placement on Existing tRee (USHER) pipeline<sup>8</sup> and the University of California Santa Cruz (UCSC) genome viewer (<https://genome.ucsc.edu/index.html>).

# *Supplementary results*

The variants that accrued in patients after treatment with Lageviro tended to be scattered across the genome and included mutations not commonly sampled in global Omicron genomes (Fig. S1). The accrued mutations we detected in the spike (s) gene tended to be clustered in two locations (Fig. S1), but the functional relevance of the mutations was unclear. While we did not detect any known drug resistance mutations, we did detect non-synonymous mutations in ORF 1b in the neighbouring amino acids (Fig. S1).

The USHER analysis showed that while most samples from individual patients clustered together there were potentially novel or rare mutations in the sequences post-treatment (Fig. 1). There were samples with so many mutations that they were phylogenetically distinct and difficult to place on the global SARS CoV-2 phylogeny. For example, the genomes from the 4<sup>th</sup> sample from Patient B (P4) and the first sample from patient D (P1) were so distinct that the minimum number of mutations needed to add the sample to the global tree was 14 and 17

respectively (Fig. 1). While the first sample taken from Patient A (P1) could be added to the global reference tree without requiring any new mutations, these mutations accrued were phylogenetically distinct indicating that the sample was phylogenetically distinct from the pre-treatment sample prior and to the other samples taken post treatment (Fig. 1).

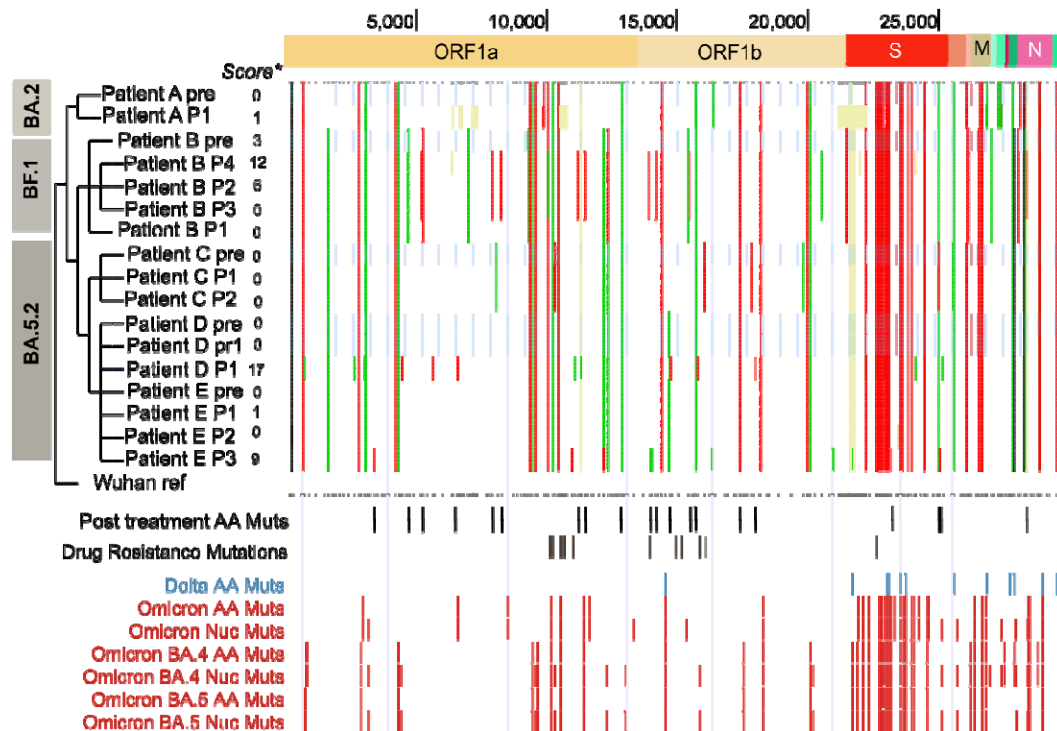

**Fig. S1:** Waterfall plot showing the SARS CoV-2 genome coordinates of the nonsynonymous (amino acid (AA), red) and synonymous mutations (nucleotide (Nuc), green) across the treated patients in this study (top panel). Mid panels = Location of non-synonymous mutations just detected in treated patients with the location of known resistance mutations below. Bottom panels: Mutations defining omicron and BA.4/5. Light blue bars: Samples taken prior to Molnupirivir treatment. We used the Ultrafast Sample placement on Existing tRee (USHER) pipeline<sup>8</sup> to generate lineage assignments, phylogenetic placement and parsimony scores (left panel). The parsimony score is based on the minimum number of additional mutations needed to place the sequence in the reference tree. Wuhan ref = Wuhan reference sequence (MN908947.3).
